# Supplementary material
Source: HighWire-hosted journal article supplement (https://adc.bmj.com/content/106/7/698)
Supplement: inline-supplementary-material-1 [file inline-supplementary-material-1.pdf]

## Appendix 1: Search criteria

MEDLINE was searched for articles from January 1<sup>st</sup> 2019-December 31<sup>st</sup> 2019 using the following terms:

```
((("Young Person* Advisory Group*" OR YPAG OR "Young Person Advisory Board*" OR "Youth Advisory Board*" OR "Co-production" OR "Co Production" OR "Focus group*" OR "Expert Group*" OR "Advisory panel*" OR "Young Person* Research Advisory Group*" OR "Advisory Group*" OR "Advisory Committee*" OR "Generation R" OR "Kids and Families impacting Disease through Science" OR iCAN OR "Young Research Advisor*" OR "ScotCRN Young Person* Group*").af OR ("Patient and Public Involvement" OR PPI OR "Patient Participation" OR "Patient Involvement").ti,ab OR "PATIENT PARTICIPATION"/) AND ((Adolescen* OR Teen* OR Youth* OR "Young Person*" OR "Young People" OR Minor*).ti,ab OR MINORS/ OR ADOLESCENT/)) [DT 2019-2020]
```

The terms (“Young Person\* Advisory Group\*” OR YPAG OR “Young Person Advisory Board\*” OR “Youth Advisory Board\*” OR “Co-production” OR “Co Production” OR “Focus group\*” OR “Expert Group\*” OR “Advisory Panel\*” OR “Young Person\* Research Advisory Group\*” OR “Advisory Group\*” OR “Advisory Committee\*” OR “Generation R” OR “Kids and Families impacting Disease through Science” OR iCAN OR “Young Research Advisor\*” OR “ScotCRN Young Person\* Group\*”) were run as an any field search.

Patient and Public Involvement terms (including the MeSH heading Patient Participation) were run as a title and abstract search.

## Appendix 2: Hand Searching of Journals

Ranking was based on the Scimago Journal Rank Indicator for Pediatrics, Perinatology and Child Health. This indicator is a measure of a journal's impact, influence or prestige. It expresses the average number of weighted citations received in the selected year by the documents published in the journal in the three previous years.

The journals searched (in descending order of ranking) were:

1. JAMA Pediatrics
2. Journal of Child Psychology and Psychiatry and Allied Disciplines
3. Developmental Review
4. Child Development
5. Pediatrics
6. Child Development Perspectives
7. Journal of Adolescent Health
8. Journal of Positive Behaviour Interventions
9. Clinical Child and Family Psychology Review
10. Pediatric Obesity
11. Infancy
12. Journal of Neurodevelopmental Disorders
13. Developmental Medicine and Child Neurology
14. European Child and Adolescent Psychiatry
15. Seminars in Fetal and Neonatal Medicine
16. Journal of Cystic Fibrosis
17. Archives of Disease in Childhood: Fetal and Neonatal Edition
18. Child Abuse and Neglect
19. The Lancet Child and Adolescent Health
20. Paediatric and Perinatal Epidemiology)
